# Supplementary material for: Airborne or Fomite Transmission for Norovirus? A Case Study Revisited
Source: MDPI journal article supplement (doi:10.3390/ijerph14121571), 2017-12-14
Supplement: s1 [file s1]

## Supplementary

### SI A. Parameter selection

**Table S1.** The material types and areas of surfaces.

| Surface                              | Material Type       | Area <sup>a</sup> (cm <sup>2</sup> ) | Data source        |
|--------------------------------------|---------------------|--------------------------------------|--------------------|
| Napkin                               | Porous surfaces     | 1600                                 | Calculated         |
| Clothes                              |                     | 15,000                               | Calculated         |
| Plate                                | Non-porous surfaces | 78                                   | Calculated         |
| Spoon                                |                     | 20                                   | Calculated         |
| Fork                                 |                     | 20                                   | Calculated         |
| Knife                                |                     | 20                                   | Calculated         |
| Glass                                |                     | 90                                   | Calculated         |
| Wine bottle                          |                     | 440                                  | Calculated         |
| Hand                                 | Skin                | 100                                  | Estimated from [1] |
| Finger contact area                  |                     | 3                                    | Estimated from [2] |
| Non-mucosal regions of head and neck |                     | 1600                                 | Calculated         |
| Mucous membranes                     | Mucous membranes    | 10                                   | Based on [3]       |

<sup>a</sup> Surface areas are effect areas that are commonly touched rather than the actual areas.

**Table S2.** Transfer rates between surfaces of different materials.

| Donor Surface      | Acceptor Surface   | Transfer Rate | Data Source        |
|--------------------|--------------------|---------------|--------------------|
| Hand               | Porous surface     | 80%           | Estimated from [4] |
| Hand               | Skin               | 50%           | Assumed            |
| Hand               | Non-porous surface | 12%           | Estimated from [5] |
| Hand               | Mucous membranes   | 36%           | Estimated from [6] |
| Porous surface     | Hand               | 3%            | Estimated from [7] |
| Skin               | Hand               | 50%           | Assumed            |
| Non-porous surface | Hand               | 11%           | Estimated from [5] |
| Mucous membranes   | Hand               | 0%            | Assumed            |

**Table S3.** First-order inactivation rates at different sites.

| Site                  | Value  | Data Source         |
|-----------------------|--------|---------------------|
| On porous surface     | 0.5/hr | Estimated from [8]  |
| On skin               | 2.4/hr | Estimated from [9]  |
| On non-porous surface | 0.1/hr | Estimated from [10] |

**Table S4.** Behaviour frequencies and assumed touching surfaces during the behaviours.

| Behaviour                                               | Executors  | Frequency | Touching Surfaces                    | Data Source         |
|---------------------------------------------------------|------------|-----------|--------------------------------------|---------------------|
| Touching one's own non-mucosal regions of head and neck | All agents | 13/h      | Non-mucosal regions of head and neck | Estimated from [11] |
| Touching one's own mucous membranes                     | All agents | 9/h       | Mucous membranes                     | Estimated from [12] |

|                         |         |                             |         |         |
|-------------------------|---------|-----------------------------|---------|---------|
| Touching plates         | Guests  | 30/h                        | Plates  | Assumed |
| Touching spoons         | Guests  | 30/h                        | Spoons  | Assumed |
| Touching forks          | Guests  | 30/h                        | Forks   | Assumed |
| Touching napkins        | Guests  | 10/h                        | Napkins | Assumed |
| Touching glasses        | Guests  | 30/h                        | Glasses | Assumed |
| Touching clothes        | Guests  | 6/h                         | Clothes | Assumed |
| Handshaking with others | Guests  | 0~3 times during the dinner | Hands   | Assumed |
| Serving the dishes      | Waiters | 5 times during the dinner   | Plates  | Assumed |
| Serving the wine        | Waiters | 5 times during the dinner   | Glasses | Assumed |
| Taking back the plates  | Waiters | 5 times during the dinner   | Plates  | Assumed |
| Taking back the glasses | Waiters | 5 times during the dinner   | Glasses | Assumed |

**Table S5.** Other parameters.

| Parameter       | Description                                                      | Value                           | Data Source                            |
|-----------------|------------------------------------------------------------------|---------------------------------|----------------------------------------|
| $T$             | Computational duration                                           | 90 minutes                      | Assumed from information from [13]     |
| $L_0$           | Virus concentration in vomitus                                   | $3 \times 10^8$ genome copies/g | Estimated from [14]                    |
| $Q_{ih}$        | Virus quantities on the index patient's hand after vomiting      | $3 \times 10^5$ genome copies   | Estimated from [9]                     |
| $Q_{wh}$        | Virus quantities on a waiter's hand after he cleaned the vomitus | $1.5 \times 10^4$ genome copies | Assumed                                |
| $\eta_m$        | Dose response parameter on the gastrointestinal tract            | 0.1415/ genome copy             | Estimated from [15]                    |
| $\varepsilon_w$ | Hand washing efficiency                                          | 0.4                             | Estimated from [16]                    |
| $N_{wd}$        | Number of waiters serving dishes                                 | 3                               | Assumed from the information from [13] |
| $N_{ww}$        | Number of waiters serving wine                                   | 3                               | Assumed from the information from [13] |
| $N_{ii1}$       | Number of interviewed ill guests in Table 1                      | 5                               | Derived from information from [13]     |
| $N_{i1}$        | Number of interviewed guests in Table 1                          | 7                               | Derived from information from [13]     |
| $N_{t1}$        | Number of the total guests in Table 1                            | 8                               | Derived from information from [13]     |

|           |                                             |    |                                    |
|-----------|---------------------------------------------|----|------------------------------------|
| $N_{ii2}$ | Number of interviewed ill guests in Table 2 | 20 | Derived from information from [13] |
| $N_{i2}$  | Number of interviewed guests in Table 2     | 22 | Derived from information from [13] |
| $N_{t2}$  | Number of the total guests in Table 2       | 22 | Derived from information from [13] |
| $N_{ii3}$ | Number of interviewed ill guests in Table 3 | 14 | Derived from information from [13] |
| $N_{i3}$  | Number of interviewed guests in Table 3     | 25 | Derived from information from [13] |
| $N_{t3}$  | Number of the total guests in Table 3       | 25 | Derived from information from [13] |
| $N_{ii4}$ | Number of interviewed ill guests in Table 4 | 10 | Derived from information from [13] |
| $N_{i4}$  | Number of interviewed guests in Table 4     | 20 | Derived from information from [13] |
| $N_{t4}$  | Number of the total guests in Table 4       | 20 | Derived from information from [13] |
| $N_{ii5}$ | Number of interviewed ill guests in Table 5 | 2  | Derived from information from [13] |
| $N_{i5}$  | Number of interviewed guests in Table 5     | 5  | Derived from information from [13] |
| $N_{t5}$  | Number of the total guests in Table 5       | 6  | Derived from information from [13] |
| $N_{ii6}$ | Number of interviewed ill guests in Table 6 | 1  | Derived from information from [13] |
| $N_{i6}$  | Number of interviewed guests in Table 6     | 4  | Derived from information from [13] |
| $N_{t6}$  | Number of the total guests in Table 6       | 45 | Derived from information from [13] |

## SI B. Supplemental figures

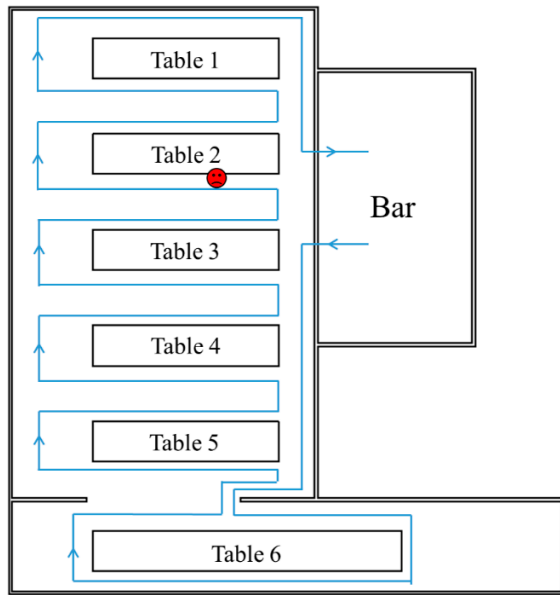

(A)

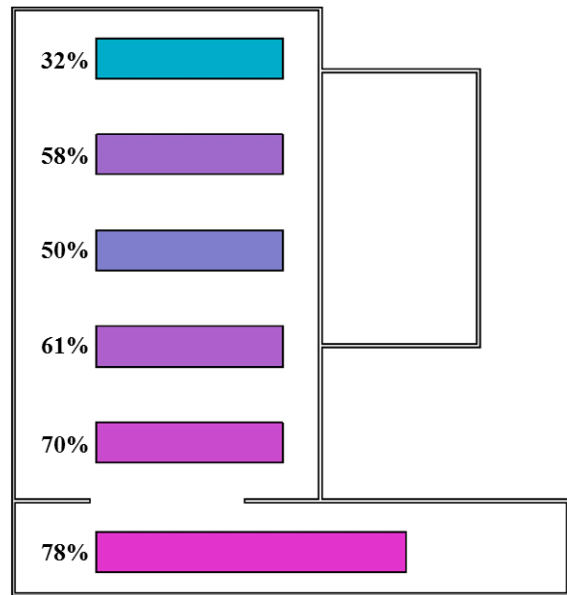

(B)

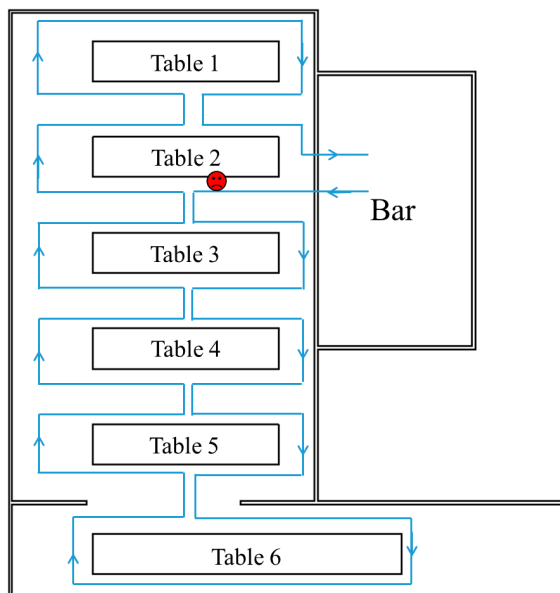

(C)

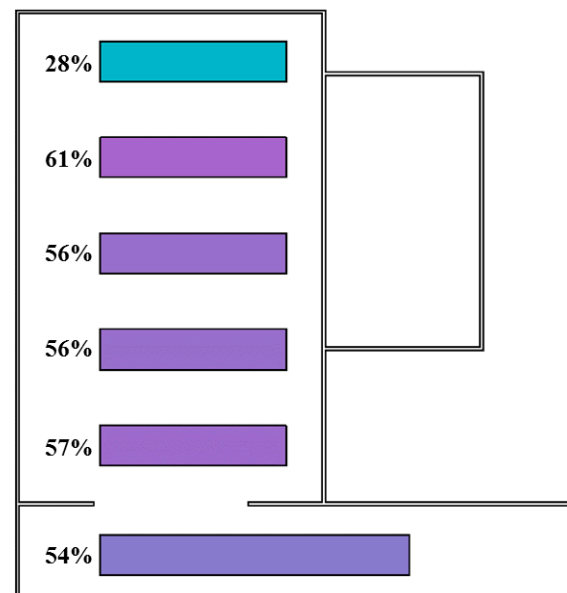

(D)

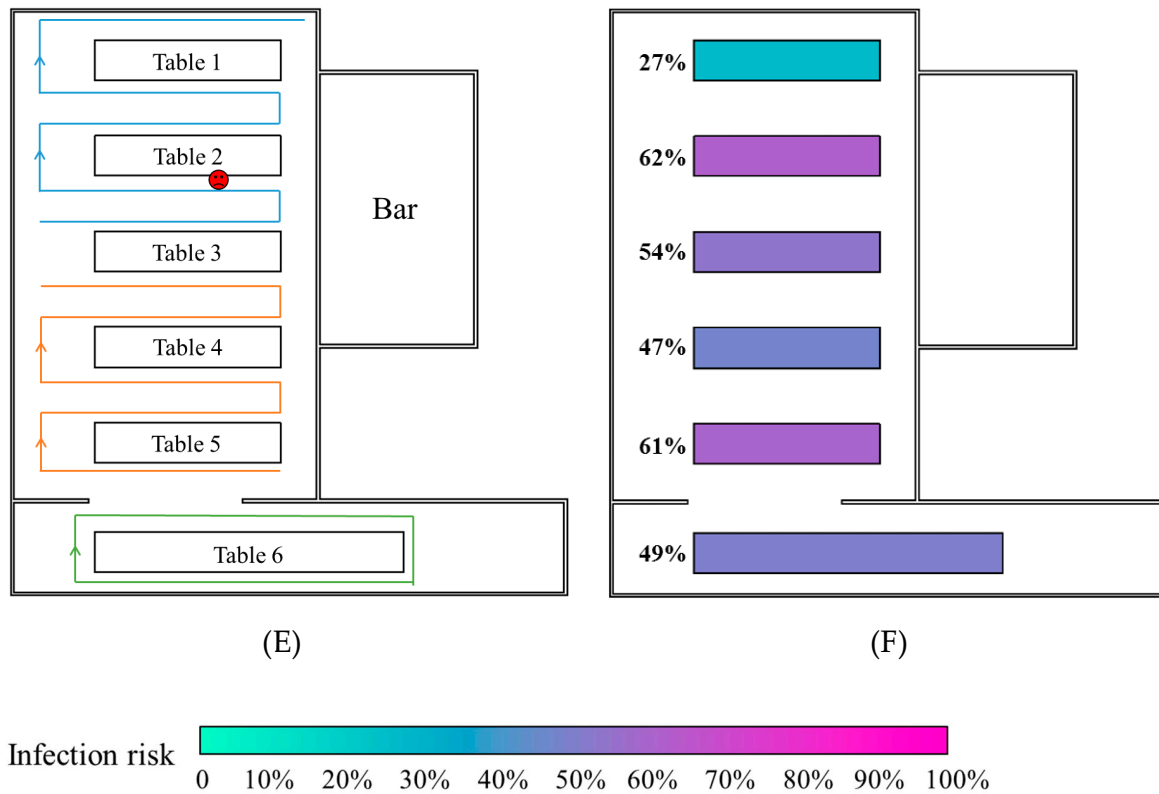

**Figure S1.** Waiters' serving patterns and predicted infection risks. (A) Waiters' serving Pathway 2. (B) Predicted average infection risk distribution (for 1,000 simulations) via the fomite route at the end of the exposure period (Pathway 2). (C) Waiters' serving Pathway 4. (D) Predicted average infection risk distribution via the fomite route (Pathway 4). (E) Waiters' serving Pathway 6. (F) Predicted average infection risk distribution via the fomite route (Pathway 6). The dose-response parameter on mucous membranes  $\eta_m = 0.1415/\text{genome copy}$  and the viral load  $L_0 = 3 \times 10^8$  genome copies/g. The location of the index patient is marked in red. The different colors of tables represent different levels of infection risk.

## References

1. Lee, J.-Y.; Choi, J.-W.; Kim, H. Determination of hand surface area by sex and body shape using alginate. *J. Physiol. Anthropol.* **2007**, *26*, 475-483. CrossRef: <http://dx.doi.org/10.2114/jpa2.26.475>; PubMed: <https://www.ncbi.nlm.nih.gov/pubmed/17704626>.
2. Wiertlewski, M.; Hayward, V. Mechanical behavior of the fingertip in the range of frequencies and displacements relevant to touch. *J. Biomech.* **2012**, *45*, 1869-1874. CrossRef: <http://dx.doi.org/10.1016/j.jbiomech.2012.05.045>; PubMed: <https://www.ncbi.nlm.nih.gov/pubmed/22732906>.
3. Gao, X. *Relative effectiveness of ventilation in community indoor environments for controlling infection*. The University of Hong Kong: Pokfulam, Hong Kong, 2011.
4. Atkinson, M. P.; Wein, L. M. Quantifying the routes of transmission for pandemic influenza. *Bull. Math. Biol.* **2008**, *70*, 820-867. CrossRef: <http://dx.doi.org/10.1007/s11538-007-9281-2>; PubMed: <https://www.ncbi.nlm.nih.gov/pubmed/18278533>.
5. Lopez, G. U. *Transfer of Microorganisms from Fomites to Hands and Risk Assessment of Contaminated and Disinfected Surfaces*. The University of Arizona: Tucson, Arizona, USA, 2013.

6. Rusin, P.; Maxwell, S.; Gerba, C. Comparative surface-to-hand and fingertip-to-mouth transfer efficiency of gram-positive bacteria, gram-negative bacteria, and phage. *J. Appl. Microbiol.* **2002**, *93*, 585-592. CrossRef: <http://dx.doi.org/10.1046/j.1365-2672.2002.01734.x>; PubMed: <https://www.ncbi.nlm.nih.gov/pubmed/12234341>.
7. Lopez, G. U.; Gerba, C. P.; Tamimi, A. H.; Kitajima, M.; Maxwell, S. L.; Rose, J. B. Transfer efficiency of bacteria and viruses from porous and nonporous fomites to fingers under different relative humidity conditions. *Appl. Environ. Microbiol.* **2013**, *79*, 5728-5734. CrossRef: <http://dx.doi.org/10.1128/AEM.01030-13>; PubMed: <https://www.ncbi.nlm.nih.gov/pubmed/23851098>.
8. Lee, J.; Zoh, K.; Ko, G. Inactivation and UV disinfection of murine norovirus with TiO<sub>2</sub> under various environmental conditions. *Appl. Environ. Microbiol.* **2008**, *74*, 2111-2117. CrossRef: <http://dx.doi.org/10.1128/AEM.02442-07>; PubMed: <https://www.ncbi.nlm.nih.gov/pubmed/18245239>.
9. Mokhtari, A.; Jaykus, L.-A. Quantitative exposure model for the transmission of norovirus in retail food preparation. *Int. J. Food Microbiol.* **2009**, *133*, 38-47. CrossRef: <http://dx.doi.org/10.1016/j.ijfoodmicro.2009.04.021>; PubMed: <https://www.ncbi.nlm.nih.gov/pubmed/19450890>.
10. Cannon, J. L.; Papafragkou, E.; Park, G. W.; Osborne, J.; Jaykus, L.-A.; Vinjé, J. Surrogates for the study of norovirus stability and inactivation in the environment: a comparison of murine norovirus and feline calicivirus. *J. Food Prot.* **2006**, *69*, 2761-2765. CrossRef: <http://dx.doi.org/10.4315/0362-028X-69.11.2761>; PubMed: <https://www.ncbi.nlm.nih.gov/pubmed/17133824>.
11. Kwok, Y. L. A.; Gralton, J.; McLaws, M.-L. Face touching: A frequent habit that has implications for hand hygiene. *Am. J. Infect. Control.* **2015**, *43*, 112-114. CrossRef: <http://dx.doi.org/10.1016/j.ajic.2014.10.015>; PubMed: <https://www.ncbi.nlm.nih.gov/pubmed/25637115>.
12. Elder, N. C.; Sawyer, W.; Pallerla, H.; Khaja, S.; Blacker, M., Hand hygiene and face touching in family medicine offices: a Cincinnati Area Research and Improvement Group (CARInG) network study. *J. Am. Board Fam. Med.* **2014**, *27*, 339-346. CrossRef: <http://dx.doi.org/10.3122/jabfm.2014.03.130242>; PubMed: <https://www.ncbi.nlm.nih.gov/pubmed/24808112>.
13. Marks, P.; Vipond, I.; Carlisle, D.; Deakin, D.; Fey, R.; Caul, E. Evidence for airborne transmission of Norwalk-like virus (NLV) in a hotel restaurant. *Epidemiol. Infect.* **2000**, *124*, 481-487. CrossRef: <http://dx.doi.org/10.1017/s0950268899003805>; PubMed: <https://www.ncbi.nlm.nih.gov/pubmed/10982072>.
14. Chan, M. C.; Sung, J. J.; Lam, R. K.; Chan, P. K.; Lee, N. L.; Lai, R. W.; Leung, W. K. Fecal viral load and norovirus-associated gastroenteritis. *Emerg. Infect. Dis.* **2006**, *12*, 1278. CrossRef: <http://dx.doi.org/10.3201/eid1208.060081>; PubMed: <https://www.ncbi.nlm.nih.gov/pubmed/16965715>.
15. Thebault, A.; Teunis, P. F. M.; Le Pendu, J.; Le Guyader, F. S.; Denis, J.-B. Infectivity of GI and GII noroviruses established from oyster related outbreaks. *Epidemics.* **2013**, *5*, 98-110. CrossRef: <http://dx.doi.org/10.1016/j.epidem.2012.12.004>; PubMed: <https://www.ncbi.nlm.nih.gov/pubmed/23746803>.
16. Pittet, D.; Dharan, S.; Touveneau, S.; Sauvan, V.; Perneger, T. V. Bacterial contamination of the hands of hospital staff during routine patient care. *Arch. Intern. Med.* **1999**, *159*, 821-826. CrossRef: <http://dx.doi.org/10.1001/archinte.159.8.821>; PubMed: <https://www.ncbi.nlm.nih.gov/pubmed/10219927>.
